# Supplementary material for: Asymmetric supercapacitors with excellent rate performance by integrating Co(OH)F nanorods and layered Ti3C2Tx paper
Source: Royal Society of Chemistry journal article supplement (doi:10.1039/c9ra06393e), 2019-01-01
Supplement: c9ra06393e1.pdf [file c9ra06393e1.pdf]

Electronic supplementary information

**Asymmetric supercapacitors with excellent rate performance by  
integrating Co(OH)F nanorods and layered  $Ti_3C_2T_x$  paper**

Si Chen<sup>1</sup>, Xuejiao Zhou<sup>1</sup>, Xinzhi Ma<sup>1</sup>, Lu Li<sup>1</sup>, Panpan Sun<sup>2</sup>, Mingyi Zhang<sup>1,\*</sup>

<sup>1</sup> Key Laboratory for Photonic and Electronic Bandgap Materials, Ministry of Education, School of Physics and Electronic Engineering, Harbin Normal University, Harbin 150025, PR China

<sup>2</sup> College of Materials and Chemical Engineering, Hubei Provincial Collaborative Innovation Center for New Energy Microgrid, Collaborative Innovation Center for Energy Equipment of Three Gorges Region, China Three Gorges University, Yichang 443002, China

### **Preparation of the layered $Ti_3C_2T_x$ -paper**

The layered  $Ti_3C_2T_x$  -paper was prepared by the etching and filtrate method. Firstly,  $Ti_3C_2T_x$  suspension was synthesized follow the next steps. 1.56 g of LiF was added to 20 mL of 12 M HCl solution and stirred. Subsequently, 1g  $Ti_3AlC_2$  was slowly added in the solution. And the solution retained at 35 °C for 48 h. The obtained deposit was clear with HCl solution, LiCl solution and deionized water, respectively. The  $Ti_3C_2T_x$  suspension would obtain by centrifuged at 5000 rpm. Secondly, The  $Ti_3C_2T_x$  -paper was got by a filtrate process that the  $Ti_3C_2T_x$  suspension was filtrated on a polypropylene separator. Finally, the  $Ti_3C_2T_x@NF$  was prepared by a physical press using two-piece Ni Foam (1\*1.5 cm).

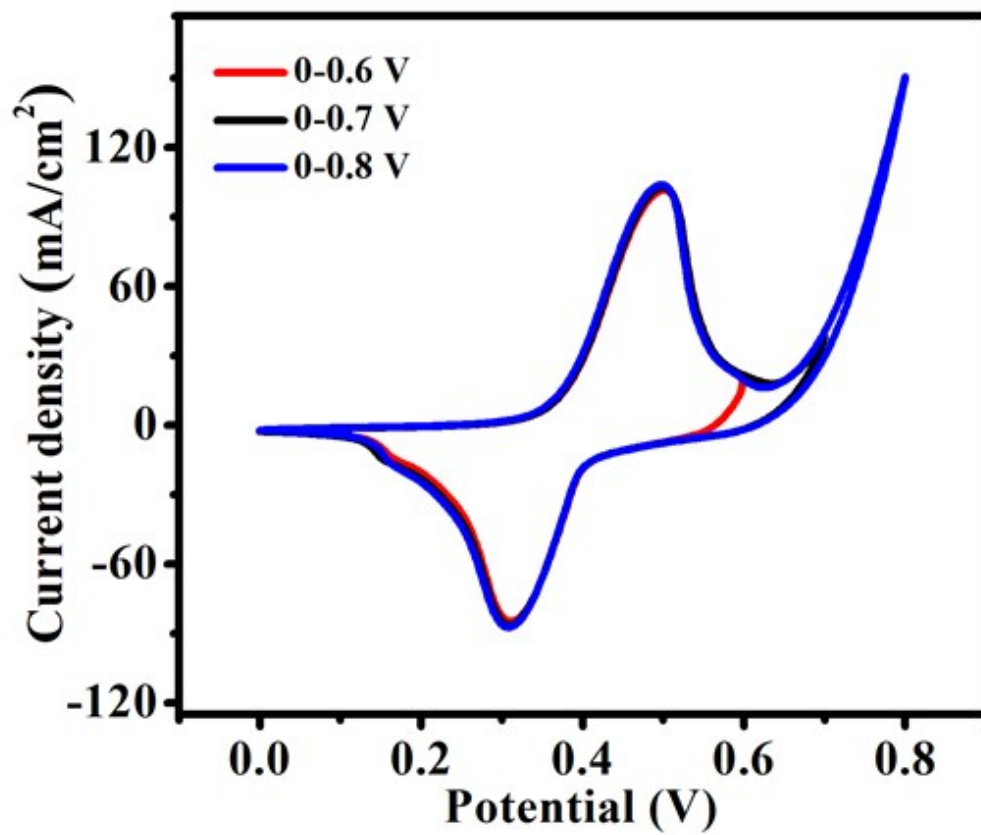

Figure S1 CV curves of the Co(OH)F@NF at different voltages

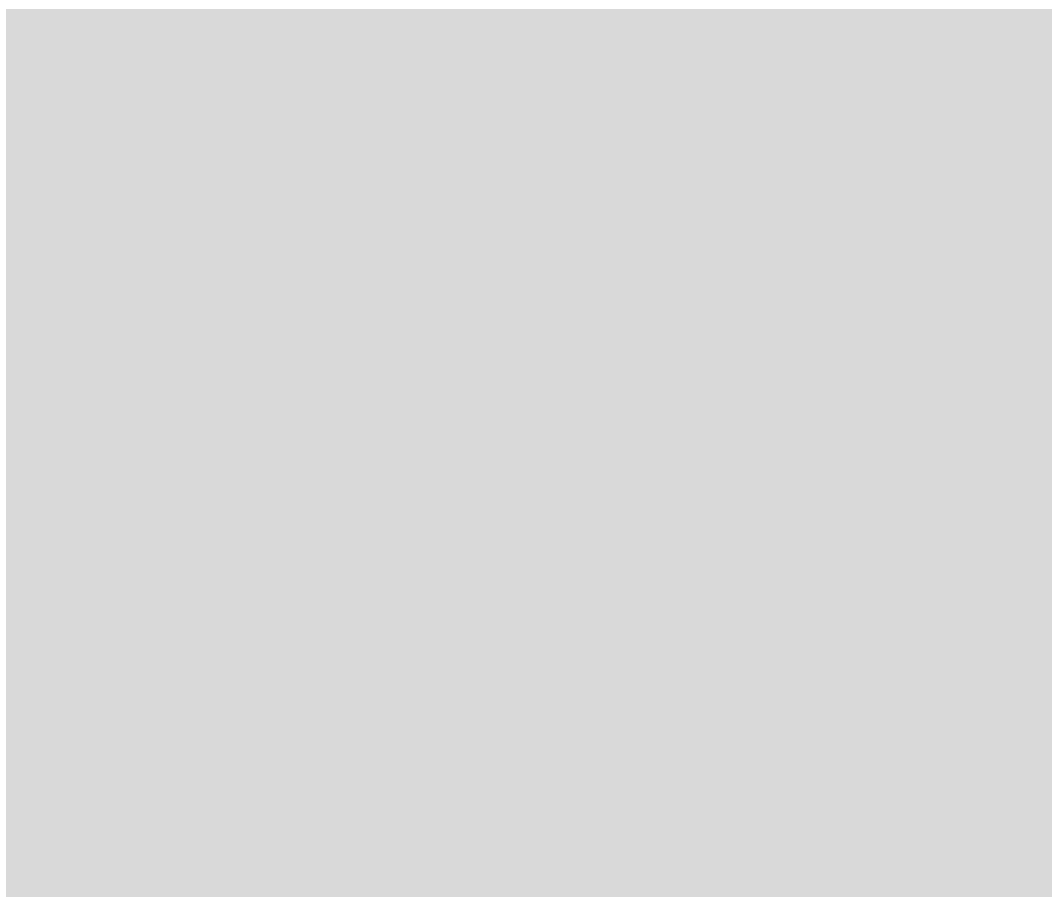

**Figure S2** CVs of Ni Foam (NF) and Co(OH)F@NF at 100 mV/s.

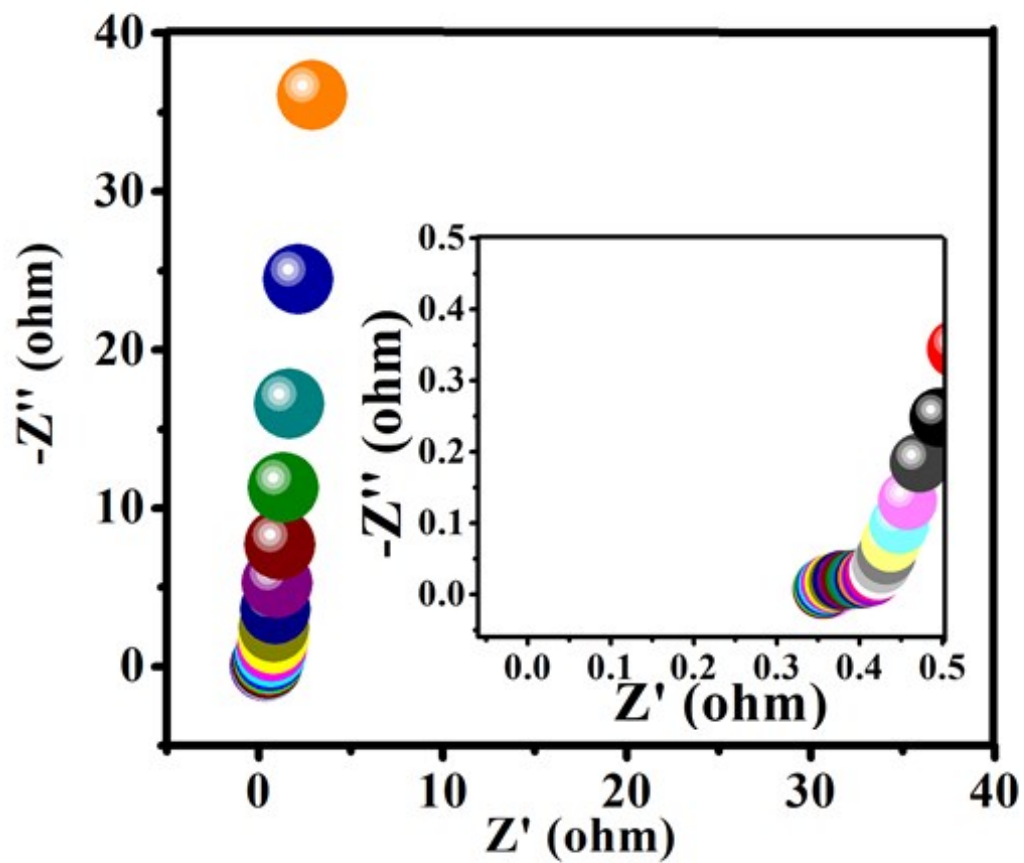

**Figure S3** EIS spectra of the Co(OH)F@NF (inset is the enlarged view of the high frequency region).

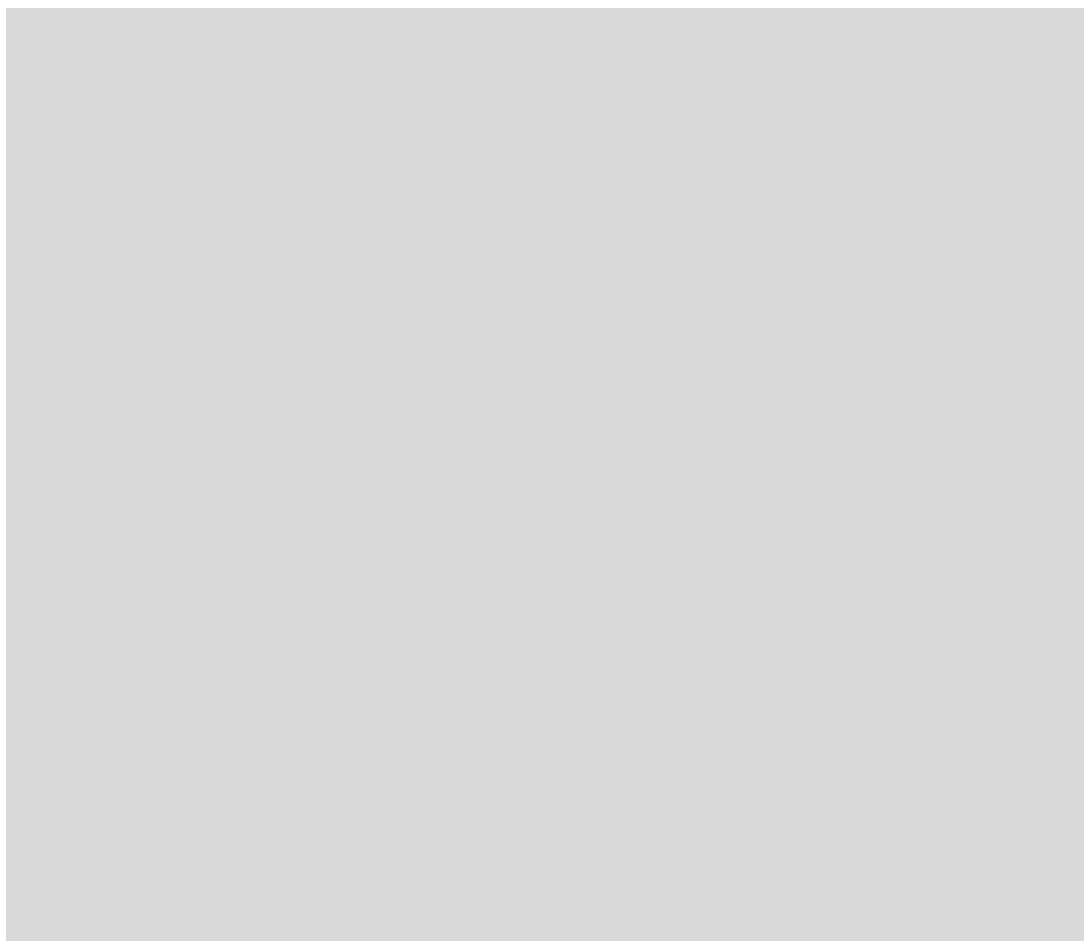

**Figure S4** CVs of Ni Foam (NF) and Ti<sub>3</sub>C<sub>2</sub>T<sub>x</sub>@NF at 100 mV/s.
